# Supplementary material for: Thermosensitive mixed shell polymeric micelles decorated with gold nanoparticles at the outmost surface: tunable surface plasmon resonance and enhanced catalytic properties with excellent colloidal stability
Source: Royal Society of Chemistry journal article supplement (doi:10.1039/c5ra06021d), 2015-01-01
Supplement: c5ra06021d1.pdf [file c5ra06021d1.pdf]

## Electronic Supplementary Information for

### Thermosensitive Mixed Shell Polymeric Micelles Decorated with Gold Nanoparticles at the Outmost Surface: Tunable Surface Plasmon Resonance and Enhanced Catalytic Properties with Excellent Colloidal Stability

Tao Yin, Xue Liu, Jianzu Wang, Yingli An, Zhenkun Zhang\*, Linqi Shi\*

Key Laboratory of Functional Polymer Materials of Ministry of Education, Institute of Polymer Chemistry, College of Chemistry and Collaborative Innovation Center of Chemical Science and Engineering (Tianjin), Nankai University, Tianjin, 300071, China

E-mail: zkzhang@nankai.edu.cn, shilinqi@nankai.edu.cn

#### Supplementary Figures

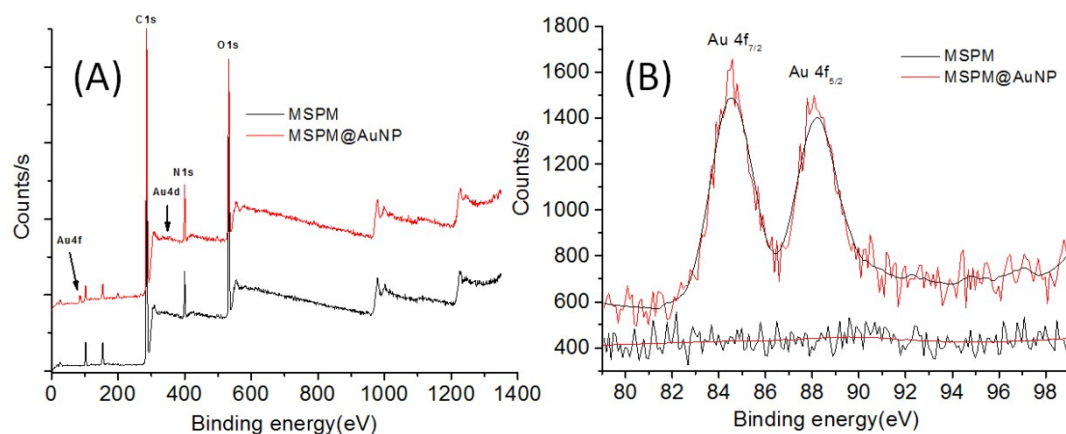

Figure S1. XPS spectra of mixed shell polymeric micelles with (MSPM@AuNP, red line) or without gold NPs (MSPM, black line) at their outmost surface. (A) Full XPS survey spectra. Apart from the O (1s), C (1s) and N (1s), new peak corresponding to Au (4f) appears in the case of MSPM@AuNP (red line), which is also magnified in (B).

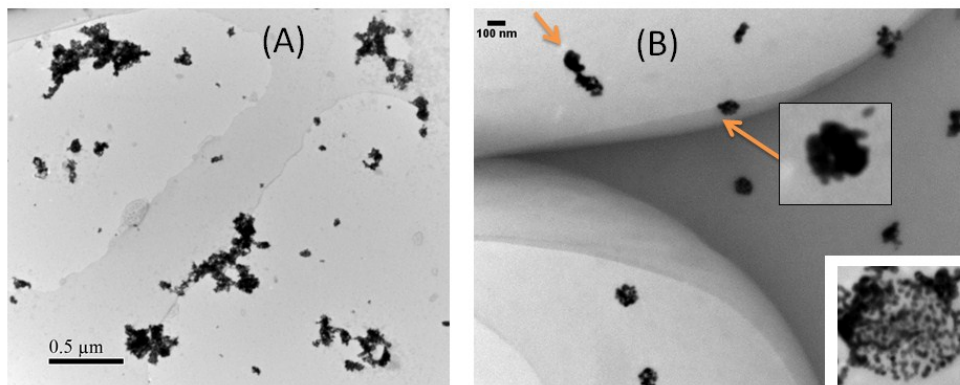

Figure S2. TEM photos of mixed shell polymeric micelles (MSPMs) decorated with gold NPs after heating/cooling cycles. (A) Irreversible aggregation occurs to polymeric micelle consisting of only PCL-*b*-PNIPAM and decorated with gold NPs at the terminal of the PNIPAM chains. (B) Well-dispersed hybrid particles are still dominant in the case of gold NP decorated MSPMs with a PEG/PNIPAM mass ratio of 1:9. Particles highlighted with arrows are those could not recover to the original state. Inset at the right-bottom corner: a hybrid particle after several rounds of the heating/cooling cycle.

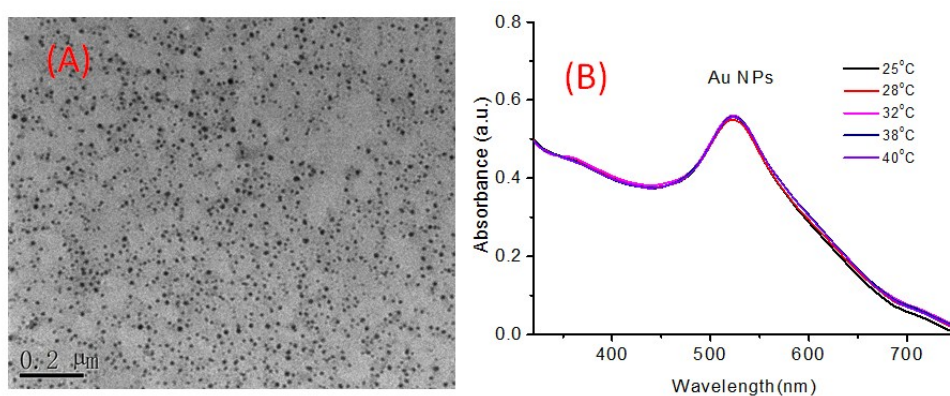

Figure S3. (A) Gold NPs stabilized with citrate. (B) UV-vis spectra of the Au NPs in (A) at various temperatures.

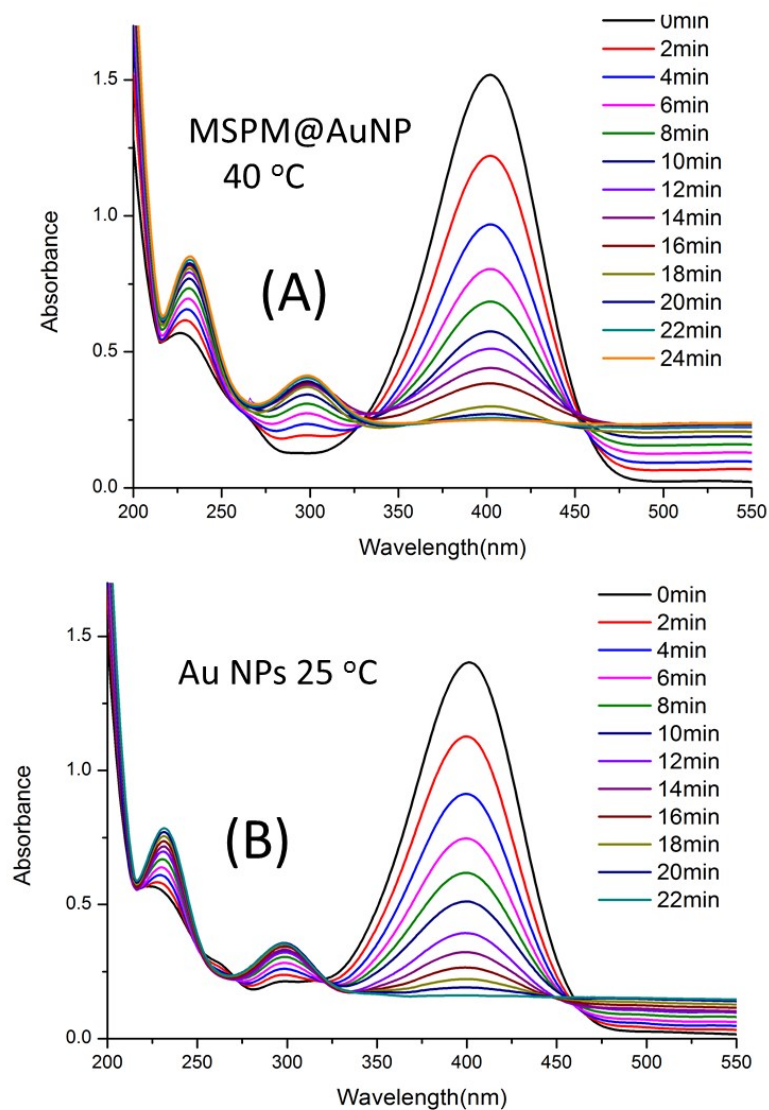

Figure S4. UV-vis absorption spectra versus time during the reduction of *p*-nitrophenol catalyzed by MSPM@AuNP at T = 40 °C (A) and citrate stabilized gold NPs at room temperature (B). The MSPM@AuNP is the same hybrid particles as those in Figure 5 of the main text.
